# Supplementary material for: [(η3-Bi3)2(IrCO)6(μ4-Bi)3]3−: a new archetype of a 15-vertex deltahedral hybrid from Bixx−-coordination aggregation of cationic [IrCO]+ units
Source: Royal Society of Chemistry journal article supplement (doi:10.1039/c9dt02559f), 2019-01-01
Supplement: c9dt02559f1.pdf [file c9dt02559f1.pdf]

## Supporting Information

# **$[(\eta^3\text{-Bi}_3)_2(\text{IrCO})_6(\mu_4\text{-Bi})_3]^{3-}$ : a new archetype of 15-vertex deltahedral hybrid From $\text{Bi}_x^{x-}$ -coordination aggregation of cationic $[\text{IrCO}]^+$ units**

Zhenyu Li,<sup>a</sup> Caiping Liu,<sup>a</sup> Jie Wu,<sup>b</sup> Zian Lin,<sup>b</sup> and Li Xu\*<sup>a</sup>

<sup>a</sup>State Key Laboratory of Structural Chemistry, Fujian Institute of Research on the Structure of Matter, Chinese Academy of Sciences, Fuzhou, Fujian, 350002.

<sup>b</sup>Ministry of Education Key Laboratory of Analytical Science for Food Safety and Biology, Fujian Provincial Key Laboratory of Analysis and Detection Technology for Food Safety, College of Chemistry, Fuzhou University, Fuzhou, Fujian, 350116, China.

\*Corresponding author

E-mail: xli@fjirsm.ac.cn.

### Table of Contents

#### S1 Experimental Details

#### S2 Molecular and Crystal structures

#### S3 Mass spectrum of 1

#### S4 Computational Methods and Details

#### S5 Energy Dispersive X-ray (EDX) Spectroscopy

#### S6 References

## S1 Experimental Details

All manipulations were carried out under argon using standard Schlenk-line and glovebox techniques. Ethylenediamine (Acros, 99%) was distilled over sodium metal and stored in a gastight Schlenk under argon in the glovebox. Toluene was dried with potassium-sodium alloy and then stored in the glovebox. Precursors with nominal composition  $K_5Bi_4^1$  was synthesized by heating the corresponding mixtures of elements (K: +99%; Bi: 99.999 %, all from Strem) at  $800^\circ\text{C}$  for two days in sealed niobium containers that were jacketed in evacuated fused-silica ampoules. 2,2,2-cryptand(TCI, 99%) and  $\text{Ir}(\text{CO})_2(\text{acac})$  (acac = acetylacetonate) (Aladdin, 97%) were used as received. IR data were recorded as KBr pellets in Nujol mulls on a Magna 750 FT-IR spectrometer photometer.

Synthesis of  $[\text{K}(2,2,2\text{-cryptand})]_3[\text{Bi}_3\{\text{Ir}_6(\text{CO})_6(\mu_4\text{-Bi})_3\}\text{Bi}_3]$  (**1**): The binary alloy with the nominal composition  $K_5Bi_4$  ( 89 mg, 0.0863 mmol) and 2,2,2-cryptand(80 mg, 0.212 mmol) were dissolved in 2 mL ethylenediamine and stirred for 0.5 hours at room temperature, resulting in a dark green solution, to which  $\text{Ir}(\text{CO})_2(\text{acac})$  (9 mg, 0.026 mmol) was added. The resulting solution was stirred for 0.5 hour at room temperature and turned brown-red. The resulting solution was filtered via a glass fiber pipette and the filtrate was layered with toluene (7 ml). Black, needle crystals of **1** were obtained after 15 days (yield, ca. 5% based on Ir). IR ( $\nu_{\text{CO}}$ ):  $1936\text{ cm}^{-1}$  (KBr pellet)

## S2 Molecular and Crystal structures

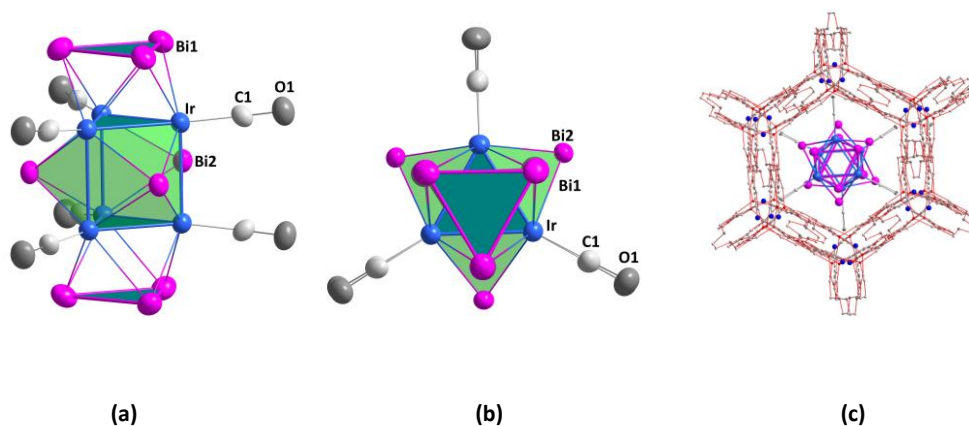

**Fig. S2.1** Crystallographic  $D_3$ -symmetric molecular structures of **1a** with 30% probability thermal ellipsoids viewed down along 2-fold axis (a) and 3-fold axis (b), respectively. The crystal structure (c) of **1** shows the hexagonal channels formed by the packing of  $[\text{K-2,2,2-cryptand}]^+$  in which **1a** is encapsulated.

### S3 Mass spectrum of 1

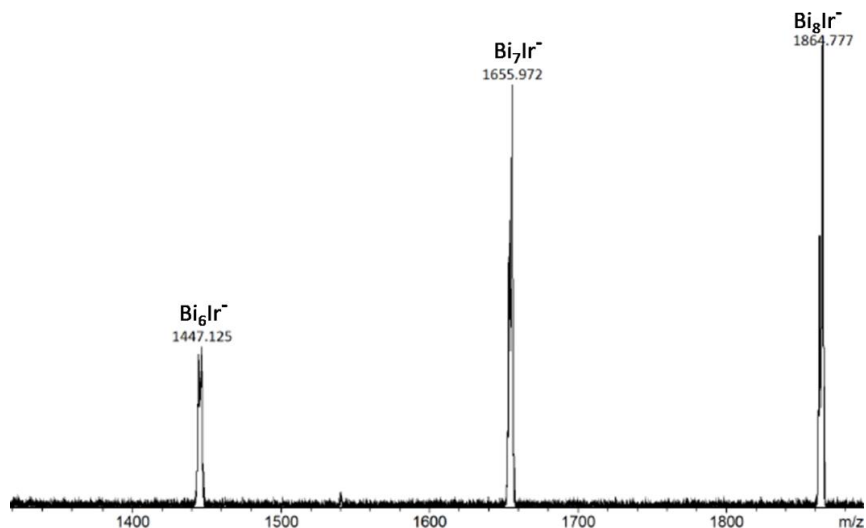

**Fig. S3.1.** LDI-TOF mass spectrum of **1**. LDI-TOF-MS (laser desorption/ionization time-of-flight mass spectrometry) of **1** was recorded on a rapifleX MALDI Tissue typer (Bruker Daltonics, Germany) in negative-ion mode. As shown in Figure S3.1, **1** was found to lose carbonyl groups and recombine to give  $[\text{Bi}_x\text{Ir}]^-$  ( $x= 6, 7, 8$ ) as in the case of other MS-characterized metal carbonyl clusters.(ref. 3g,8,15c)

### S4 Computational Methods and Details

DFT calculations were performed using the GAUSSIAN 09(Revision D.01)<sup>2</sup> program package on the PBE0/def2-TZVP level.<sup>3,4</sup> In these calculations, the solvent effects were taken into account by the conductor-like polarizable continuum model (C-PCM).<sup>5</sup> The geometric and electronic structure for **1a** was optimized and the final Cartesian coordinates were provided in Table S4.1. The analyses of adaptive natural density partitioning (AdNDP) were performed by Multiwfn<sup>6</sup>, which is a multifunctional wavefunction analysis program developed by Lu et. al. and can be freely downloaded.

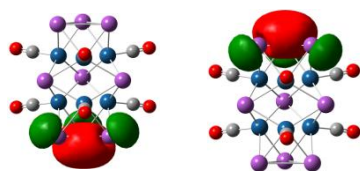

(a)  $\eta^3\text{-Bi}_3$  3c-2e bonding in **1a**

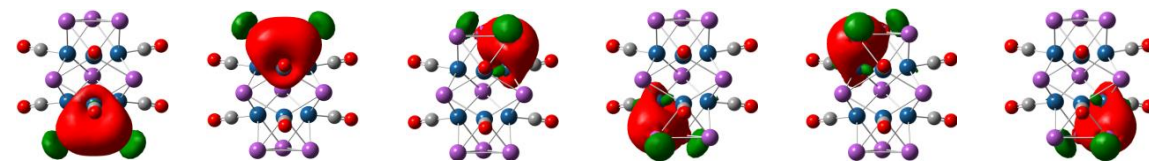

(b)  $\text{Bi}_2\text{Ir}$  3c-2e bonding

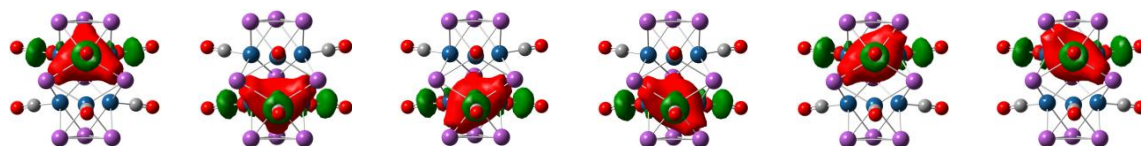

(c) Ir<sub>3</sub>-based 2e bonding

**Fig. S4.1** Multi-center 2e-AdNDP orbitals for **1a** (Bi: purple; Ir: blue; C: grey; O: red)

**Table S4.1** Cartesian Coordinates of optimized **1a**.

|    |             |             |             |
|----|-------------|-------------|-------------|
| Ir | -1.51200859 | -0.87295856 | 1.44199600  |
| Bi | -2.38968265 | 1.37968392  | -0.00000000 |
| Bi | 0.00000000  | -2.75936784 | -0.00000000 |
| Bi | -1.58107906 | 0.91283642  | 3.50340000  |
| Bi | 0.00000000  | -1.82567284 | 3.50340000  |
| C  | -3.08057069 | -1.77856832 | 1.64692200  |
| Ir | 0.00000000  | 1.74591713  | 1.44199600  |
| Ir | -1.51200859 | -0.87295856 | -1.44199600 |
| Ir | 0.00000000  | 1.74591713  | -1.44199600 |
| Bi | -1.58107906 | 0.91283642  | -3.50340000 |
| Ir | 1.51200859  | -0.87295856 | 1.44199600  |
| Ir | 1.51200859  | -0.87295856 | -1.44199600 |
| Bi | -0.00000000 | -1.82567284 | -3.50340000 |
| Bi | 1.58107906  | 0.91283642  | 3.50340000  |
| O  | -4.08584088 | -2.35896133 | 1.82350800  |
| Bi | 2.38968265  | 1.37968392  | -0.00000000 |
| C  | 0.00000000  | 3.55713664  | 1.64692200  |
| C  | -3.08057069 | -1.77856832 | -1.64692200 |
| Bi | 1.58107906  | 0.91283642  | -3.50340000 |
| C  | -0.00000000 | 3.55713664  | -1.64692200 |
| C  | 3.08057069  | -1.77856832 | 1.64692200  |
| C  | 3.08057069  | -1.77856832 | -1.64692200 |
| O  | 0.00000000  | 4.71792266  | 1.82350800  |
| O  | -4.08584088 | -2.35896133 | -1.82350800 |
| O  | 0.00000000  | 4.71792266  | -1.82350800 |
| O  | 4.08584088  | -2.35896133 | 1.82350800  |
| O  | 4.08584088  | -2.35896133 | -1.82350800 |

## S5 Energy Dispersive X-ray (EDX) Spectroscopy

The quantitative Energy-Dispersive X-ray spectroscopy (EDX, JEOL-SEM, JSM-6700F) analysis of the crystals shows the presence of elements Bi, Ir and K with the roughly expected ratios 9/6/3.

| Element | EDX      |        |       |
|---------|----------|--------|-------|
|         | Weight % | Atom % | Ratio |
| Bi      | 59.34    | 49.33  | 9     |
| Ir      | 36.73    | 33.20  | 6.05  |
| K       | 3.93     | 17.47  | 3.18  |

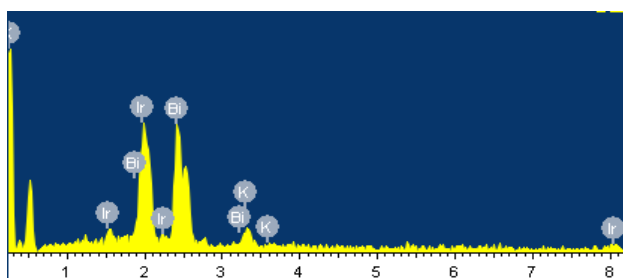

Fig. S5.1. EDX spectroscopy of 1.

## S6 References

- 1 F. Gascoin, S. C. Sevov, *Inorg. Chem.* 2001, **40**, 5177.
- 2 Gaussian 09, Revision D.01, M. J. Frisch, G. W. Trucks, H. B. Schlegel, G. E. Scuseria, M. A. Robb, J. R. Cheeseman, G. Scalmani, V. Barone, B. Mennucci, G. A. Petersson, H. Nakatsuji, M. Caricato, X. Li, H. P. Hratchian, A. F. Izmaylov, J. Bloino, G. Zheng, J. L. Sonnenberg, M. Hada, M. Ehara, K. Toyota, R. Fukuda, J. Hasegawa, M. Ishida, T. Nakajima, Y. Honda, O. Kitao, H. Nakai, T. Vreven, J. A. Montgomery, Jr., J. E. Peralta, F. Ogliaro, M. Bearpark, J. J. Heyd, E. Brothers, K. N. Kudin, V. N. Staroverov, R. Kobayashi, J. Normand, K. Raghavachari, A. Rendell, J. C. Burant, S. S. Iyengar, J. Tomasi, M. Cossi, N. Rega, J. M. Millam, M. Klene, J. E. Knox, J. B. Cross, V. Bakken, C. Adamo, J. Jaramillo, R. Gomperts, R. E. Stratmann, O. Yazyev, A. J. Austin, R. Cammi, C. Pomelli, J. W. Ochterski, R. L. Martin, K. Morokuma, V. G. Zakrzewski, G. A. Voth, P. Salvador, J. J. Dannenberg, S. Dapprich, A. D. Daniels, Ö. Farkas, J. B. Foresman, J. V. Ortiz, J. Cioslowski, and D. J. Fox, Gaussian, Inc., Wallingford CT, 2009.
- 3 a) J. P. Perdew, K. Burke, M. Ernzerhof, *Phys. Rev. Lett.* 1996, **77**, 3865. b) J. P. Perdew, K. Burke, M. Ernzerhof, *Phys. Rev. Lett.* 1997, **78**, 1396.
- 4 F. Weigend, R. Ahlrichs, *Phys. Chem. Chem. Phys.* 2005, **7**, 3297.
- 5 A. Klamt, G. Schuurmann, *J. Chem. Soc. Perkin Trans.* 1993, **2**, 799.
- 6 a) T. Lu, F. Chen, *J. Comput. Chem.* 2012, **33**, 580. b) T. Lu, F. Chen, *J. Mol. Graph. Model.* 2012, **38**, 314.
